# Supplementary material for: Nanohydrogels Based on Self-Assembly of Cationic Pullulan and Anionic Dextran Derivatives for Efficient Delivery of Piroxicam
Source: MDPI journal article supplement (doi:10.3390/pharmaceutics11120622), 2019-11-21
Supplement: s1 [file s1]

# Supplementary Materials: Nanohydrogels Based on Self-Assembly of Cationic Pullulan and Anionic Dextran Derivatives for Efficient Delivery of Piroxicam

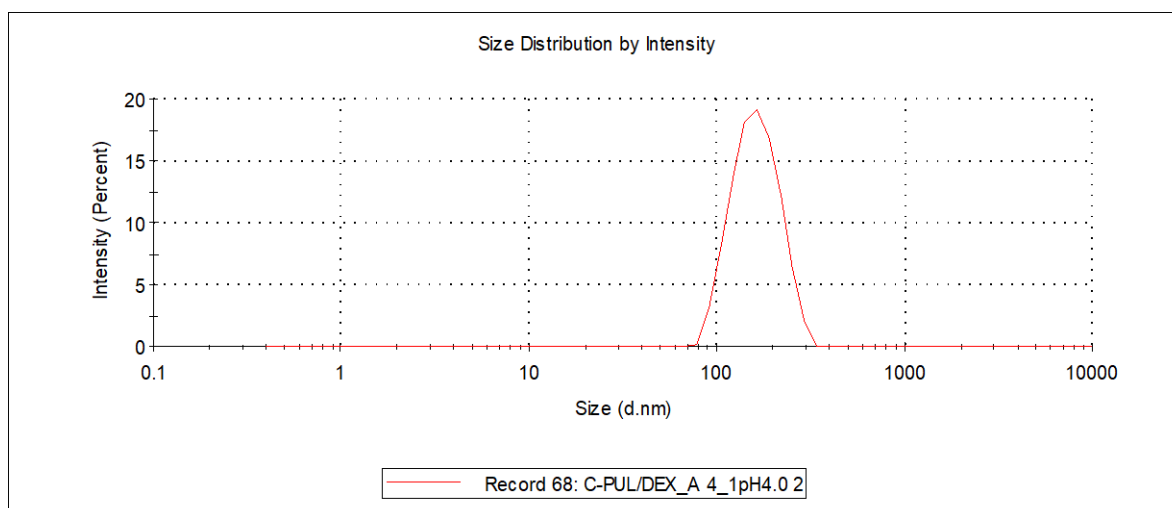

**Figure S1.** DLS estimation of nanogel particles C-PUL/DEX-A (4:1 system with piroxicam) hydrodynamic diameter in pH = 4.0 (buffer acetate).

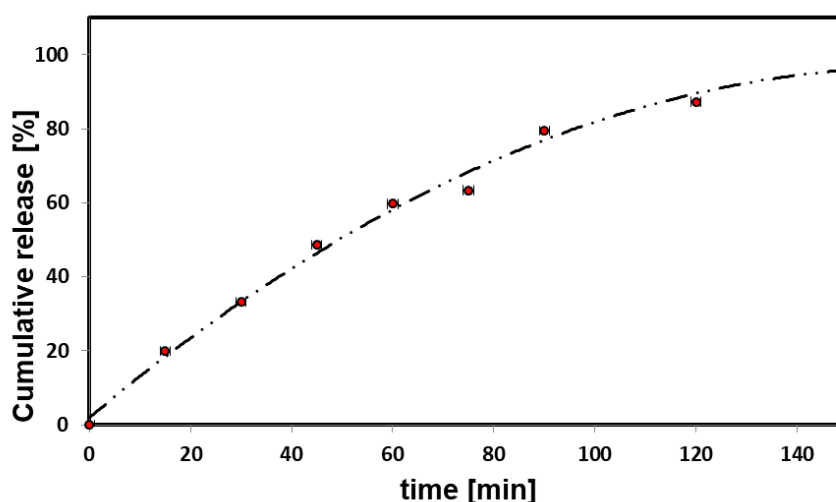

**Figure S2.** Piroxicam release profile (37 °C, pH = 4) from 4:1 C-PUL/DEX-A nanohydrogel. The error bars represent mean and standard deviations of the single experiments ( $n = 3$ ).

**Table S1.** Substitution degrees for the obtained cationic derivative of pullulan (C-PUL).

| Material | Degree of substitution (DS %) (based on $^1\text{H}$ NMR spectrum) | Degree of substitution (DS %) (based on XPS spectrum) |
|----------|--------------------------------------------------------------------|-------------------------------------------------------|
| C-PUL    | $10.8 \pm 2.21$                                                    | $12.1 \pm 0.91$                                       |
